# Supplementary material for: A highly active and stable Zn@C/HZSM-5 catalyst using Zn@C derived from ZIF-8 as a template for conversion of glycerol to aromatics
Source: Royal Society of Chemistry journal article supplement (doi:10.1039/c8cy02217h), 2019-01-01
Supplement: c8cy02217h1.pdf [file c8cy02217h1.pdf]

**Supporting Information of**  
**Highly active and stable Zn@C/HZSM-5 catalyst using Zn@C derived from**  
**ZIF-8 as a template for conversion of glycerol to aromatics**

Donghui Pan, Siqun Xu, Yanan Miao, Ningning Xu, Huazheng Wang, Xianghai Song,

Lijing Gao, Guomin Xiao\*

School of Chemistry and Chemical Engineering, Southeast University, Nanjing, Jiangsu, 211189,  
P. R. China.

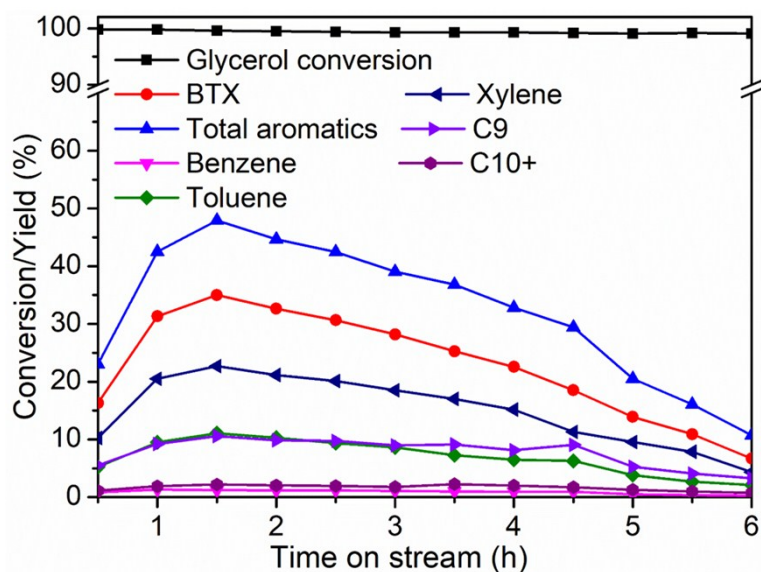

Fig. S1. The catalytic performance of Sn/HZSM-5(IM) prepared by impregnation method. Reaction conditions: 40wt % glycerol/methanol, atmospheric pressure, 400 °C, WHSV=0.83 h<sup>-1</sup>.

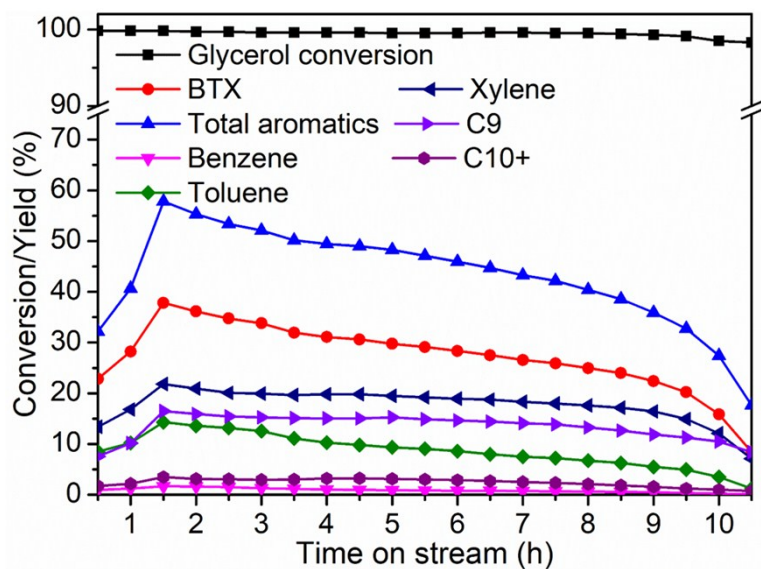

Fig. S2. The catalytic performance of Zn@C/HZSM-5. Reaction conditions: 40wt % glycerol/methanol, atmospheric pressure, 400 °C, WHSV=0.71 h<sup>-1</sup>.

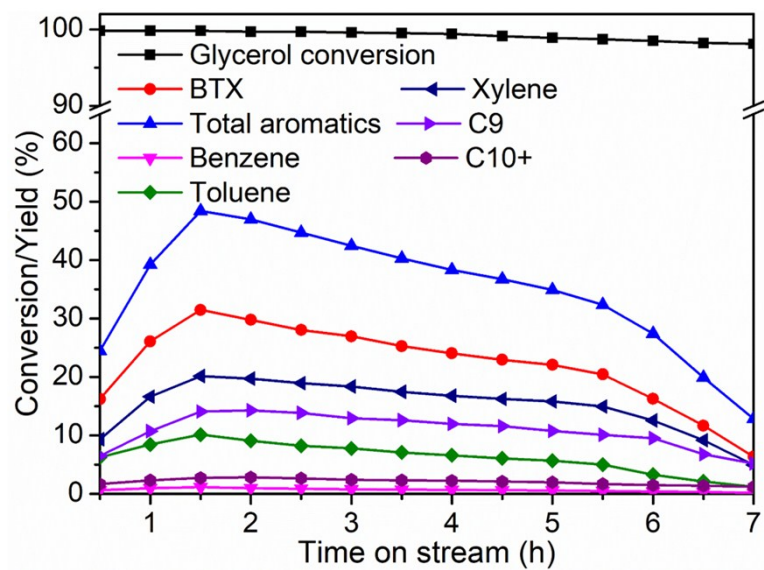

Fig. S3. The catalytic performance of Zn@C/HZSM-5. Reaction conditions: 40wt % glycerol/methanol, atmospheric pressure, 400 °C, WHSV=1.07 h<sup>-1</sup>.
